# Supplementary material for: The social determinants of suicide: an umbrella review
Source: medRxiv preprint, doi:10.1101/2024.08.09.24311718, version 2 (2024-08-12)
Supplement: Supplementary File 3 [file 311718_file04.docx]

**Data Extraction Template**

| **Title of Systematic Review** |  |
| --- | --- |
| **URL to paper** |  |
| **Author, year of publication** |  |
| **Aim of review** |  |
| **Type of review** |  |
| **Inclusion/exclusion criteria** |  |
| **Social determinant(s) examined, and definition(s) used** |  |
| **Number of included studies** |  |
| **Types of included studies** |  |
| **Year range of included studies** |  |
| **Appraisal tool used / operationalised** |  |
| **Countries** |  |
| **Study settings** |  |
| **Populations of interest** |  |
| **Age range** |  |
| **Gender** |  |
| **Measurement tools used (if applicable)** |  |
| **Total sample size (or study specific sample sizes for meta analysis)** |  |
| **Findings (for each SD):** |  |
| **Total number of events** |  |
| **Descriptive conclusions** |  |
| **Effect estimates with 95% CI** |  |
| **Qualitative findings** |  |
| **Stratification of evidence** |  |
| **Risk of bias/quality assessment** |  |
